# Supplementary material for: Linking specific biological signatures to different childhood adversities: findings from the HERO project
Source: PubMed Central journal article supplement (PMC10382309; doi:10.1038/s41390-022-02415-y), 2023-01-17

## Supplementary Online Content

### Linking specific biological signatures to different forms of childhood adversities: Findings from the Health's Early Roots & Origins (HERO) project.

**Table S1.** Spearman's rank correlation between collected hair mass and cortisol, cortisone, and dehydroepiandrosterone (DHEA) concentrations.

**Table S2.** Biomarkers' concentrations by study's site.

**Table S3.** Bootstrapped regression coefficients of the association of early life adversity measures with infants' cytokines and steroids.

**Table S4.** Interaction cross-product regression coefficients of the association of early life adversity measures with infants' cytokines and steroids.

**Table S.5.** Regression coefficients with the interaction of Socioeconomic Disadvantage and Family Function in HERO Phase-I.

**Graphical summary**

**Table S1.** Spearman’s rank correlation between collected hair mass and cortisol, cortisone, and dehydroepiandrosterone (DHEA) concentrations.

| Biomarkers | Hair mass (mg) |          |            |          |
|------------|----------------|----------|------------|----------|
|            | Phase-I        |          | Phase-II   |          |
|            | <i>rho</i>     | <i>p</i> | <i>rho</i> | <i>p</i> |
| Cortisol   | -0.11          | 0.324    | -0.23      | 0.079    |
| Cortisone  | -0.01          | 0.937    | -0.11      | 0.407    |
| DHEA       | -0.13          | 0.273    | -0.20      | 0.142    |

**Table S2.** Biomarkers’ concentrations by study’s site.

| PHASE-I       |                        |                       |                        |                        |           |          |
|---------------|------------------------|-----------------------|------------------------|------------------------|-----------|----------|
| Biomarkers    | Study site             |                       |                        |                        | Statistic |          |
|               | Site 1                 | Site 2                | Site 3                 | Site 4                 | <i>F</i>  | <i>p</i> |
|               | N= 53<br><i>M (SD)</i> | N=10<br><i>M (SD)</i> | N=38<br><i>M (SD)</i>  | N=59<br><i>M (SD)</i>  |           |          |
| TNF- $\alpha$ | 0.07 (0.46)            | -0.46 (0.63)          | -0.18 (0.43)           | 0.16 (0.3)             | 4.16      | 0.010    |
| IL-1 $\beta$  | -0.05 (0.45)           | 0.13 (0.26)           | -0.02 (0.52)           | 0.09 (0.48)            | 0.87      | 0.459    |
| IL-6          | 0.07 (0.49)            | -0.22 (0.35)          | -0.01 (0.42)           | 0.02 (0.51)            | 0.70      | 0.555    |
| IL-8          | -0.03 (0.46)           | -0.21 (0.48)          | 0.03 (0.48)            | 0.08 (0.46)            | 0.94      | 0.422    |
| Cortisol      | -0.05 (0.93)           | 0.04 (0.14)           | 0.28 (1.08)            | -0.14 (0.61)           | 0.68      | 0.569    |
| Cortisone     | 0 (0.35)               | 0.06 (0.49)           | 0.11 (0.45)            | -0.11 (0.5)            | 0.73      | 0.540    |
| DHEA          | -0.05 (0.43)           | -0.23 (0.27)          | 0.09 (0.27)            | 0.06 (0.47)            | 0.90      | 0.448    |
| PHASE-II      |                        |                       |                        |                        |           |          |
| Biomarkers    | Study site             |                       |                        |                        | Statistic |          |
|               | Site 1                 | Site 2                | Site 3                 | Site 4                 | <i>F</i>  | <i>p</i> |
|               | N= 50<br><i>M (SD)</i> | N= 9<br><i>M (SD)</i> | N= 43<br><i>M (SD)</i> | N= 43<br><i>M (SD)</i> |           |          |
| TNF- $\alpha$ | 0.08 (0.34)            | -0.05 (0.63)          | 0.01 (0.38)            | 0.12 (0.42)            | 0.75      | 0.524    |
| IL-1 $\beta$  | 0.04 (0.51)            | -0.17 (0.9)           | 0.04 (0.5)             | 0.11 (0.42)            | 0.73      | 0.539    |
| IL-6          | 0.13 (0.48)            | -0.01 (0.47)          | -0.11 (0.53)           | 0.01 (0.41)            | 1.80      | 0.149    |
| IL-8          | 0.05 (0.43)            | 0.04 (0.8)            | 0.13 (0.48)            | 0 (0.5)                | 0.52      | 0.668    |
| Cortisol      | -0.08 (0.84)           | -                     | 0.16 (0.78)            | -0.05 (0.96)           | 0.41      | 0.664    |
| Cortisone     | -0.02 (0.44)           | -                     | -0.02 (0.32)           | -0.03 (0.24)           | 0.00      | 0.998    |
| DHEA          | -0.23 (0.47)           | -                     | 0.36 (0.33)            | 0.44 (0.35)            | 14.12     | <0.001   |

**Table S3.** Bootstrapped regression coefficients of the association of early life adversity measures with infants' cytokines and steroids.

| Outcome             | SES-D       |                      | GAD-2 |                | FAD         |                      | CES-D   |                |
|---------------------|-------------|----------------------|-------|----------------|-------------|----------------------|---------|----------------|
|                     | B           | Boot CI              | B     | Boot CI        | B           | Boot CI              | $\beta$ | Boot CI        |
| TNF- $\alpha$ pg/ml | <b>0.13</b> | <b>[0.04 : 0.23]</b> | 0.01  | [-0.10 : 0.05] | -0.01       | [-0.05 : 0.01]       | 0.00    | [-0.03 : 0.02] |
| IL-1 $\beta$ pg/ml  | <b>0.10</b> | <b>[0.01 : 0.20]</b> | -0.02 | [-0.09 : 0.05] | 0.00        | [-0.03 : 0.02]       | 0.00    | [-0.03 : 0.02] |
| IL-6 pg/ml          | 0.03        | [-0.06 : 0.12]       | 0.02  | [-0.09 : 0.11] | -0.02       | [-0.05 : 0.01]       | 0.01    | [-0.03 : 0.05] |
| IL-8 pg/ml          | 0.07        | [-0.02 : 0.16]       | -0.01 | [-0.08 : 0.08] | -0.01       | [-0.04 : 0.02]       | 0.01    | [-0.02 : 0.03] |
| Cortisol<br>pg/mg   | -0.02       | [-0.29 : 0.23]       | -0.08 | [-0.20 : 0.05] | <b>0.08</b> | <b>[0.01 : 0.16]</b> | 0.03    | [-0.04 : 0.10] |
| Cortisone<br>pg/mg  | 0.00        | [-0.13 : 0.12]       | 0.02  | [-0.04 : 0.08] | <b>0.05</b> | <b>[0.02 : 0.09]</b> | -0.02   | [-0.04 : 0.01] |
| DHEA pg/mg          | <b>0.16</b> | <b>[0.03 : 0.27]</b> | 0.03  | [-0.04 : 0.10] | 0.00        | [-0.04 : 0.04]       | -0.03   | [-0.06 : 0.00] |

*Note.* Bold lettering indicates 500 bootstrapping resampling significant associations. Boot CI = 2.5 and 97.5 percentiles. SES-D: Socioeconomic disadvantage index; CES-D: Center for Epidemiological Depression scale; GAD-2: Generalized Anxiety Disorder scale; FAD: Family Assessment Device.

**Table S4.** Interaction cross-product regression coefficients of the association of early life adversity measures with infants' cytokines and steroids.

Interactions by age

| Outcome             | <i>Phase-I</i> |                 |       |                 | <i>Phase-II</i> |                 |         |                 |
|---------------------|----------------|-----------------|-------|-----------------|-----------------|-----------------|---------|-----------------|
|                     | SES-D          |                 | FAD   |                 | SES-D           |                 | CES-D   |                 |
|                     | $\beta$        | <i>FDR</i><br>q | B     | <i>FDR</i><br>q | B               | <i>FDR</i><br>q | $\beta$ | <i>FDR</i><br>q |
| TNF- $\alpha$ pg/ml | 0.00           | 0.893           | 0.00  | 0.295           | 0.00            | 0.914           | 0.00    | 0.698           |
| IL-1 $\beta$ pg/ml  | 0.00           | 0.918           | 0.00  | 0.867           | -0.01           | 0.448           | 0.00    | 0.460           |
| IL-6 pg/ml          | 0.00           | 0.893           | 0.00  | 0.426           | 0.00            | 0.914           | 0.00    | 0.460           |
| IL-8 pg/ml          | 0.00           | 0.893           | 0.00  | 0.481           | -0.01           | 0.531           | 0.00    | 0.460           |
| Cortisol pg/mg      | 0.02           | 0.135           | -0.01 | 0.191           | 0.02            | 0.914           | -0.01   | 0.698           |
| Cortisone pg/mg     | 0.00           | 0.918           | 0.00  | 0.295           | 0.00            | 0.996           | 0.00    | 0.911           |
| DHEA pg/mg          | 0.00           | 0.918           | 0.00  | 0.481           | 0.00            | 0.996           | 0.00    | 0.934           |

Interactions by sex

| Outcome             | <i>Phase-I</i> |                 |       |                 | <i>Phase-II</i> |                 |         |                 |
|---------------------|----------------|-----------------|-------|-----------------|-----------------|-----------------|---------|-----------------|
|                     | SES-D          |                 | FAD   |                 | SES-D           |                 | CESD-8  |                 |
|                     | B              | <i>FDR</i><br>q | B     | <i>FDR</i><br>q | B               | <i>FDR</i><br>q | $\beta$ | <i>FDR</i><br>q |
| TNF- $\alpha$ pg/ml | 0.00           | 0.893           | 0.00  | 0.295           | 0.00            | 0.914           | 0.00    | 0.698           |
| IL-1 $\beta$ pg/ml  | 0.00           | 0.918           | 0.00  | 0.867           | -0.01           | 0.448           | 0.00    | 0.460           |
| IL-6 pg/ml          | 0.00           | 0.893           | 0.00  | 0.426           | 0.00            | 0.914           | 0.00    | 0.460           |
| IL-8 pg/ml          | 0.00           | 0.893           | 0.00  | 0.481           | -0.01           | 0.531           | 0.00    | 0.460           |
| Cortisol pg/mg      | 0.02           | 0.135           | -0.01 | 0.191           | 0.02            | 0.914           | -0.01   | 0.698           |
| Cortisone pg/mg     | 0.00           | 0.918           | 0.00  | 0.295           | 0.00            | 0.996           | 0.00    | 0.911           |
| DHEA pg/mg          | 0.00           | 0.918           | 0.00  | 0.481           | 0.00            | 0.996           | 0.00    | 0.934           |

*Note.* SES-D: Socioeconomic disadvantage index; CESD-8: Center for Epidemiological Depression scale; GAD-2: Generalized Anxiety Disorder scale; FAD: Family Assessment Device.

**Table S.5.** Regression coefficients with the interaction of Socioeconomic Disadvantage and Family Function in HERO Phase-I.

| Outcome                | SES   |       | GAD-2 |       | FAD   |       | CESD-8 |       | SES x FAD    |                 | $R^2$ |
|------------------------|-------|-------|-------|-------|-------|-------|--------|-------|--------------|-----------------|-------|
|                        | B     | $p$   | B     | $p$   | B     | $p$   | B      | $p$   | $\beta$      | $\frac{FDR}{q}$ |       |
| TNF- $\alpha$<br>pg/ml | 0.22  | 0.248 | -0.02 | 0.317 | -0.01 | 0.430 | 0.00   | 0.720 | -0.01        | 0.496           | 0.11  |
| IL-1 $\beta$ pg/ml     | 0.09  | 0.578 | 0.00  | 0.856 | 0.00  | 0.878 | 0.00   | 0.582 | 0.00         | 0.496           | 0.04  |
| IL-6 pg/ml             | -0.10 | 0.559 | 0.00  | 0.950 | -0.02 | 0.313 | 0.00   | 0.677 | 0.02         | 0.467           | 0.02  |
| IL-8 pg/ml             | 0.07  | 0.671 | 0.00  | 0.795 | 0.00  | 0.805 | 0.00   | 0.659 | 0.00         | 0.496           | 0.02  |
| Cortisol<br>pg/mg      | 0.71  | 0.059 | -0.04 | 0.274 | 0.04  | 0.260 | 0.03   | 0.176 | <b>-0.13</b> | <b>0.028</b>    | 0.15  |
| Cortisone<br>pg/mg     | -0.06 | 0.737 | 0.01  | 0.397 | 0.05  | 0.005 | -0.01  | 0.216 | 0.01         | 0.496           | 0.12  |
| DHEA<br>pg/mg          | -0.02 | 0.909 | 0.01  | 0.732 | 0.00  | 0.968 | -0.01  | 0.321 | 0.02         | 0.467           | 0.09  |

*Note.* Bold lettering indicates FDR adjusted significant interaction ( $p < 0.05$ ). SES-D: Socioeconomic disadvantage index; CESD-8: Center for Epidemiological Depression scale; GAD-2: Generalized Anxiety Disorder scale; FAD: Family Assessment Device.

# Graphical Summary HERO Phase I

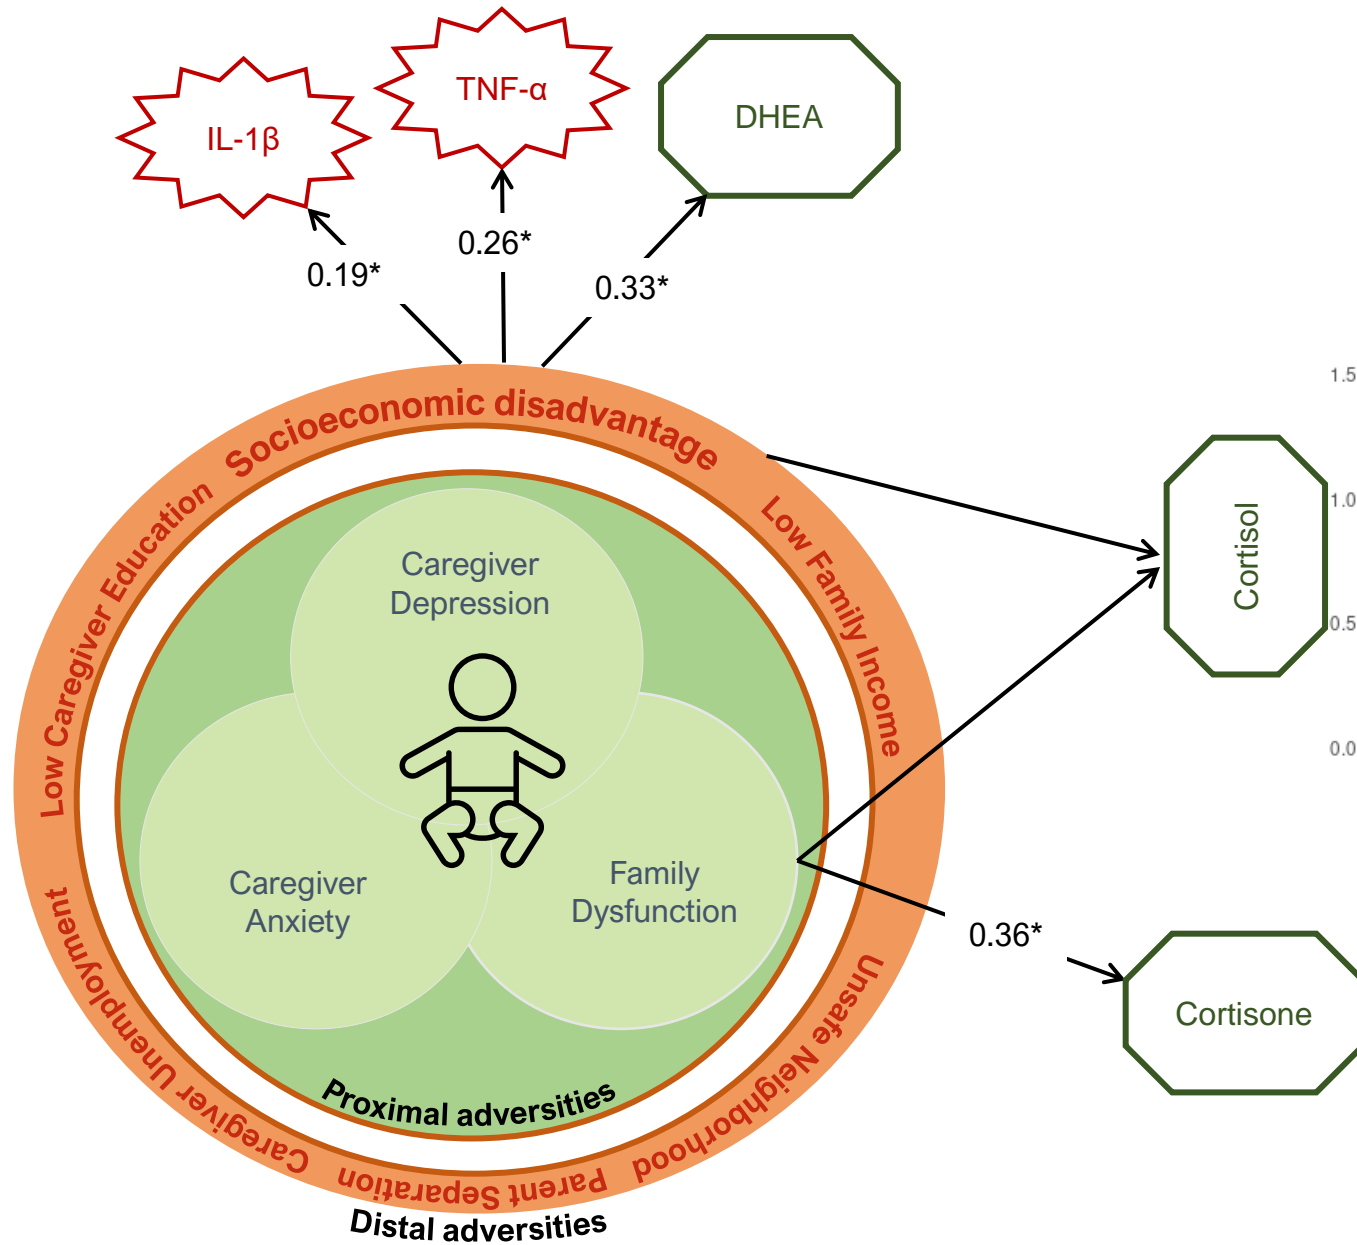

Socioeconomic Disadvantage  
X  
Family Dysfunction

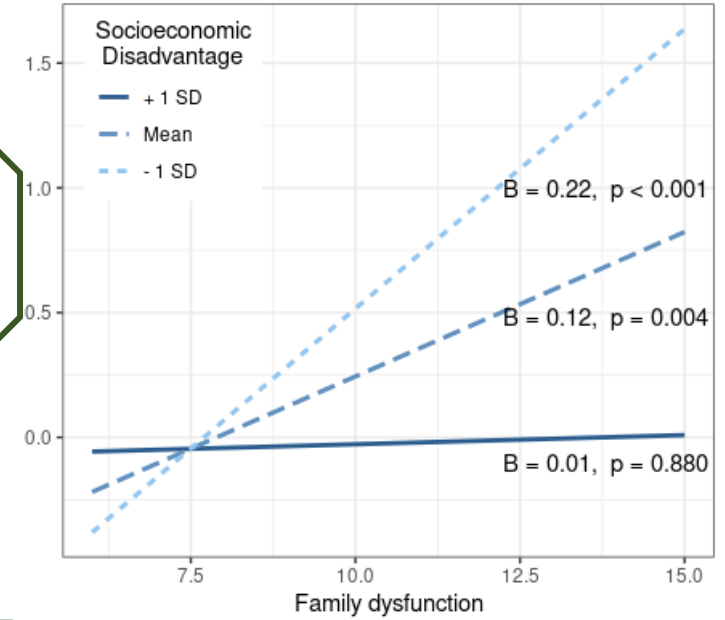

Supplement: 41390_2022_2415_MOESM1_ESM.pdf [file 41390_2022_2415_MOESM1_ESM.pdf]
